# Supplementary material for: Structural, Electric and Dynamic Properties of (Pyrrolidinium)3[Bi2I9] and (Pyrrolidinium)3[Sb2I9]: New Lead-Free, Organic–Inorganic Hybrids with Narrow Band Gaps
Source: MDPI journal article supplement (doi:10.3390/molecules28093894), 2023-05-05
Supplement: s1 [file s1]

Electronic Supporting Information for:

**Structural, electric and dynamic properties of [pyrrolidinium]<sub>3</sub>Bi<sub>2</sub>I<sub>9</sub> and [pyrrolidinium]<sub>3</sub>Sb<sub>2</sub>I<sub>9</sub>; new lead-free organic-inorganic hybrids with narrow band gaps**

Authors: M. Rowińska<sup>1</sup>, A. Piecha<sup>2</sup>, W. Medycki<sup>3</sup>, Piotr Durlak<sup>2</sup>, R. Jakubas<sup>2</sup>, A. Gągor<sup>1\*</sup>

<sup>1</sup> *W. Trzebiatowski Institute of Low Temperature and Structure Research Polish Academy of Science, P.O. Box 1410, Wrocław, 50-950, Poland*

<sup>1</sup> *Faculty of Chemistry, University of Wrocław, F. Joliot-Curie 14, Wrocław, 50-383, Poland*

<sup>3</sup> *Institute of Molecular Physics, Polish Academy of Sciences, Smoluchowskiego 17, Poznań, 60-179, Poland*

\* - Corresponding Author; e-mail: [a.gagor@intibs.pl](mailto:a.gagor@intibs.pl)

**Table S1. Experimental details**

For all structures: crystal system orthorhombic, space group *Cmcm*,  $Z = 4$ . Experiments were carried out with Mo *K* $\alpha$  radiation using a Xcalibur, Atlas. Absorption was corrected for by multi-scan methods, *CrysAlis PRO* 1.171.38.43 (Rigaku Oxford Diffraction, 2015) Empirical absorption correction using spherical harmonics, implemented in SCALE3 ABSPACK scaling algorithm was implemented. H-atom parameters were constrained.

|                                                                            | (pyrrolidinium) <sub>3</sub> [Bi <sub>2</sub> I <sub>9</sub> ]                                        | (pyrrolidinium) <sub>3</sub> [Sb <sub>2</sub> I <sub>9</sub> ]      |
|----------------------------------------------------------------------------|-------------------------------------------------------------------------------------------------------|---------------------------------------------------------------------|
| <b>Crystal data</b>                                                        |                                                                                                       |                                                                     |
| Chemical formula                                                           | Bi <sub>2</sub> I <sub>9</sub> ·2(C <sub>4</sub> H <sub>9.5</sub> N)·C <sub>4</sub> H <sub>10</sub> N | I <sub>9</sub> Sb <sub>2</sub> ·3(C <sub>4</sub> H <sub>10</sub> N) |
| $M_r$                                                                      | 1776.45                                                                                               | 1601.99                                                             |
| Temperature (K)                                                            | 230                                                                                                   | 240                                                                 |
| $a, b, c$ (Å)                                                              | 8.6726 (3), 18.1683 (8), 22.5902 (9)                                                                  | 8.5167 (5), 18.2142 (11), 22.6087 (19)                              |
| $V$ (Å <sup>3</sup> )                                                      | 3559.5 (2)                                                                                            | 3507.2 (4)                                                          |
| $\mu$ (mm <sup>-1</sup> )                                                  | 17.69                                                                                                 | 9.47                                                                |
| Crystal size (mm)                                                          | 0.33 × 0.21 × 0.18                                                                                    | 0.25 × 0.18 × 0.07                                                  |
| <b>Data collection</b>                                                     |                                                                                                       |                                                                     |
| $T_{\min}, T_{\max}$                                                       | 0.370, 1.000                                                                                          | 0.447, 1.000                                                        |
| No. of measured, independent and observed [ $I > 2\sigma(I)$ ] reflections | 15444, 2437, 1484                                                                                     | 17033, 2402, 1685                                                   |
| $R_{\text{int}}$                                                           | 0.051                                                                                                 | 0.044                                                               |
| $(\sin \theta/\lambda)_{\max}$ (Å <sup>-1</sup> )                          | 0.690                                                                                                 | 0.687                                                               |
| <b>Refinement</b>                                                          |                                                                                                       |                                                                     |
| $R[F^2 > 2\sigma(F^2)], wR(F^2), S$                                        | 0.052, 0.105, 1.02                                                                                    | 0.053, 0.130, 1.07                                                  |
| No. of reflections                                                         | 2437                                                                                                  | 2402                                                                |
| No. of parameters                                                          | 59                                                                                                    | 63                                                                  |
| No. of restraints                                                          | 6                                                                                                     | 4                                                                   |
|                                                                            | $w = 1/[\sigma^2(F_o^2) + (0.029P)^2 + 57.7983P]$                                                     | $w = 1/[\sigma^2(F_o^2) + (0.0413P)^2 + 60.7163P]$                  |
|                                                                            | where $P = (F_o^2 + 2F_c^2)/3$                                                                        | where $P = (F_o^2 + 2F_c^2)/3$                                      |
| $\Delta\rho_{\max}, \Delta\rho_{\min}$ (e Å <sup>-3</sup> )                | 0.93, -0.98                                                                                           | 1.17, -1.15                                                         |

Computer programs: *CrysAlis PRO* 1.171.38.43 (Rigaku OD, 2015), *SHELXT* 2018/2 (Sheldrick, 2018), *SHELXL* 2018/3 (Sheldrick, 2015), *Olex2* 1.5 (Dolomanov *et al.*, 2009).

**Table S2. Selected geometric parameters (Å, °)**

| (pyrrolidinium) <sub>3</sub> [Bi <sub>2</sub> I <sub>9</sub> ] 230 K |             | (pyrrolidinium) <sub>3</sub> [Sb <sub>2</sub> I <sub>9</sub> ] 240 K |             |
|----------------------------------------------------------------------|-------------|----------------------------------------------------------------------|-------------|
| Bi1—I1 <sup>i</sup>                                                  | 3.2429 (9)  | Sb1—I2                                                               | 3.2375 (12) |
| Bi1—I1                                                               | 3.2429 (9)  | Sb1—I3                                                               | 3.2245 (9)  |
| Bi1—I2                                                               | 3.2458 (12) | Sb1—I3 <sup>i</sup>                                                  | 3.2245 (9)  |
| Bi1—I3                                                               | 2.9498 (9)  | Sb1—I4                                                               | 2.8600 (9)  |
| Bi1—I3 <sup>ii</sup>                                                 | 2.9498 (9)  | Sb1—I4 <sup>ii</sup>                                                 | 2.8601 (9)  |
| Bi1—I4                                                               | 2.9505 (14) | Sb1—I5                                                               | 2.8623 (14) |
|                                                                      |             |                                                                      |             |
| I1—Bi1—I1 <sup>i</sup>                                               | 83.63 (4)   | I3 <sup>i</sup> —Sb1—I2                                              | 82.40 (3)   |
| I1 <sup>i</sup> —Bi1—I2                                              | 81.89 (2)   | I3—Sb1—I2                                                            | 82.40 (3)   |
| I1—Bi1—I2                                                            | 81.89 (2)   | I3—Sb1—I3 <sup>i</sup>                                               | 83.92 (3)   |
| I3—Bi1—I1 <sup>i</sup>                                               | 89.95 (3)   | I4 <sup>ii</sup> —Sb1—I2                                             | 92.36 (3)   |
| I3 <sup>ii</sup> —Bi1—I1                                             | 89.95 (3)   | I4—Sb1—I2                                                            | 92.36 (3)   |
| I3 <sup>ii</sup> —Bi1—I1 <sup>i</sup>                                | 171.66 (3)  | I4—Sb1—I3 <sup>i</sup>                                               | 89.67 (2)   |
| I3—Bi1—I1                                                            | 171.67 (3)  | I4 <sup>ii</sup> —Sb1—I3                                             | 89.67 (2)   |
| I3—Bi1—I2                                                            | 91.97 (3)   | I4—Sb1—I3                                                            | 172.19 (3)  |
| I3 <sup>ii</sup> —Bi1—I2                                             | 91.97 (3)   | I4 <sup>ii</sup> —Sb1—I3 <sup>i</sup>                                | 172.19 (3)  |
| I3 <sup>ii</sup> —Bi1—I3                                             | 95.92 (5)   | I4—Sb1—I4 <sup>ii</sup>                                              | 96.35 (5)   |
| I3 <sup>ii</sup> —Bi1—I4                                             | 91.58 (3)   | I4 <sup>ii</sup> —Sb1—I5                                             | 91.73 (3)   |
| I3—Bi1—I4                                                            | 91.58 (3)   | I4—Sb1—I5                                                            | 91.73 (3)   |
| I4—Bi1—I1 <sup>i</sup>                                               | 94.18 (3)   | I5—Sb1—I2                                                            | 173.86 (4)  |
| I4—Bi1—I1                                                            | 94.18 (3)   | I5—Sb1—I3 <sup>i</sup>                                               | 93.05 (3)   |
| I4—Bi1—I2                                                            | 174.70 (4)  | I5—Sb1—I3                                                            | 93.05 (3)   |
| Bi1—I1—Bi1 <sup>iii</sup>                                            | 80.89 (3)   | Sb1 <sup>iii</sup> —I2—Sb1                                           | 80.01 (4)   |
| Bi1—I2—Bi1 <sup>iii</sup>                                            | 80.80 (4)   | Sb1 <sup>iii</sup> —I3—Sb1                                           | 80.40 (3)   |

Symmetry code(s): (i)  $-x+1, y, -z+3/2$ ; (ii)  $-x+1, y, z$ ; (iii)  $x, y, -z+3/2$ .

**Table S3. Experimental details 1 at rt**

| (pyrrolidinium) <sub>3</sub> [Bi <sub>2</sub> I <sub>9</sub> ] RoomTemperature                                 |                                                                                     |
|----------------------------------------------------------------------------------------------------------------|-------------------------------------------------------------------------------------|
| <b>Crystal data</b>                                                                                            |                                                                                     |
| Chemical formula                                                                                               | Bi <sub>2</sub> I <sub>9</sub> ·1.5(C <sub>8</sub> H <sub>20</sub> N <sub>2</sub> ) |
| <i>M<sub>r</sub></i>                                                                                           | 1776.45                                                                             |
| Crystal system, space group                                                                                    | Orthorhombic, <i>Cmcm</i>                                                           |
| Temperature (K)                                                                                                | 298                                                                                 |
| <i>a</i> , <i>b</i> , <i>c</i> (Å)                                                                             | 8.7266 (3), 18.1985 (8), 22.6661 (11)                                               |
| <i>V</i> (Å <sup>3</sup> )                                                                                     | 3599.6 (3)                                                                          |
| <i>Z</i>                                                                                                       | 4                                                                                   |
| Radiation type                                                                                                 | Mo <i>K</i> α                                                                       |
| μ (mm <sup>-1</sup> )                                                                                          | 17.49                                                                               |
| Crystal size (mm)                                                                                              | 0.22 × 0.18 × 0.07                                                                  |
| <b>Data collection</b>                                                                                         |                                                                                     |
| Diffractionmeter                                                                                               | Xcalibur, Atlas                                                                     |
| <i>T</i> <sub>min</sub> , <i>T</i> <sub>max</sub>                                                              | 0.135, 1.000                                                                        |
| No. of measured, independent and observed [ <i>I</i> > 2σ( <i>I</i> )] reflections                             | 36050, 2014, 1621                                                                   |
| <i>R</i> <sub>int</sub>                                                                                        | 0.046                                                                               |
| (sin θ/λ) <sub>max</sub> (Å <sup>-1</sup> )                                                                    | 0.625                                                                               |
| <b>Refinement</b>                                                                                              |                                                                                     |
| <i>R</i> [ <i>F</i> <sup>2</sup> > 2σ( <i>F</i> <sup>2</sup> )], <i>wR</i> ( <i>F</i> <sup>2</sup> ), <i>S</i> | 0.047, 0.114, 1.17                                                                  |
| No. of reflections                                                                                             | 2014                                                                                |
| No. of parameters                                                                                              | 59                                                                                  |
| No. of restraints                                                                                              | 5                                                                                   |
| H-atom treatment                                                                                               | H-atom parameters constrained                                                       |
|                                                                                                                | $w = 1/[\sigma^2(F_o^2) + (0.0333P)^2 + 63.0922P]$                                  |
|                                                                                                                | where $P = (F_o^2 + 2F_c^2)/3$                                                      |
| Δρ <sub>max</sub> , Δρ <sub>min</sub> (e Å <sup>-3</sup> )                                                     | 1.11, -1.06                                                                         |

Computer programs: *CrysAlis PRO* 1.171.38.43 (Rigaku OD, 2015), *SHELXL* 2018/3 (Sheldrick, 2015), *Olex2* 1.5 (Dolomanov *et al.*, 2009).

**Table S4. Selected geometric parameters of 1 (Å, °)**

| (pyrrolidinium) <sub>3</sub> [Bi <sub>2</sub> I <sub>9</sub> ] _room_temperature |             |                          |             |
|----------------------------------------------------------------------------------|-------------|--------------------------|-------------|
| Bi1—I2                                                                           | 3.2413 (13) | Bi1—I4 <sup>ii</sup>     | 2.9513 (10) |
| Bi1—I3                                                                           | 3.2417 (10) | Bi1—I4                   | 2.9513 (10) |
| Bi1—I3 <sup>i</sup>                                                              | 3.2417 (10) | Bi1—I5                   | 2.9517 (15) |
|                                                                                  |             |                          |             |
| I2—Bi1—I3                                                                        | 81.48 (3)   | I4 <sup>ii</sup> —Bi1—I4 | 95.90 (5)   |
| I2—Bi1—I3 <sup>i</sup>                                                           | 81.48 (3)   | I4 <sup>ii</sup> —Bi1—I5 | 91.67 (3)   |
| I3—Bi1—I3 <sup>i</sup>                                                           | 83.46 (4)   | I4—Bi1—I5                | 91.67 (3)   |
| I4—Bi1—I2                                                                        | 92.03 (3)   | I5—Bi1—I2                | 174.48 (4)  |
| I4 <sup>ii</sup> —Bi1—I2                                                         | 92.03 (3)   | I5—Bi1—I3                | 94.42 (4)   |
| I4 <sup>ii</sup> —Bi1—I3 <sup>i</sup>                                            | 171.39 (3)  | I5—Bi1—I3 <sup>i</sup>   | 94.42 (4)   |

|                          |            |                            |           |
|--------------------------|------------|----------------------------|-----------|
| I4 <sup>ii</sup> —Bi1—I3 | 90.01 (3)  | Bi1—I2—Bi1 <sup>iii</sup>  | 81.31 (4) |
| I4—Bi1—I3                | 171.39 (3) | Bi1 <sup>iii</sup> —I3—Bi1 | 81.30 (3) |
| I4—Bi1—I3 <sup>i</sup>   | 90.01 (3)  |                            |           |

Symmetry code(s): (i)  $-x+1, y, -z+3/2$ ; (ii)  $-x+1, y, z$ ; (iii)  $x, y, -z+3/2$ .

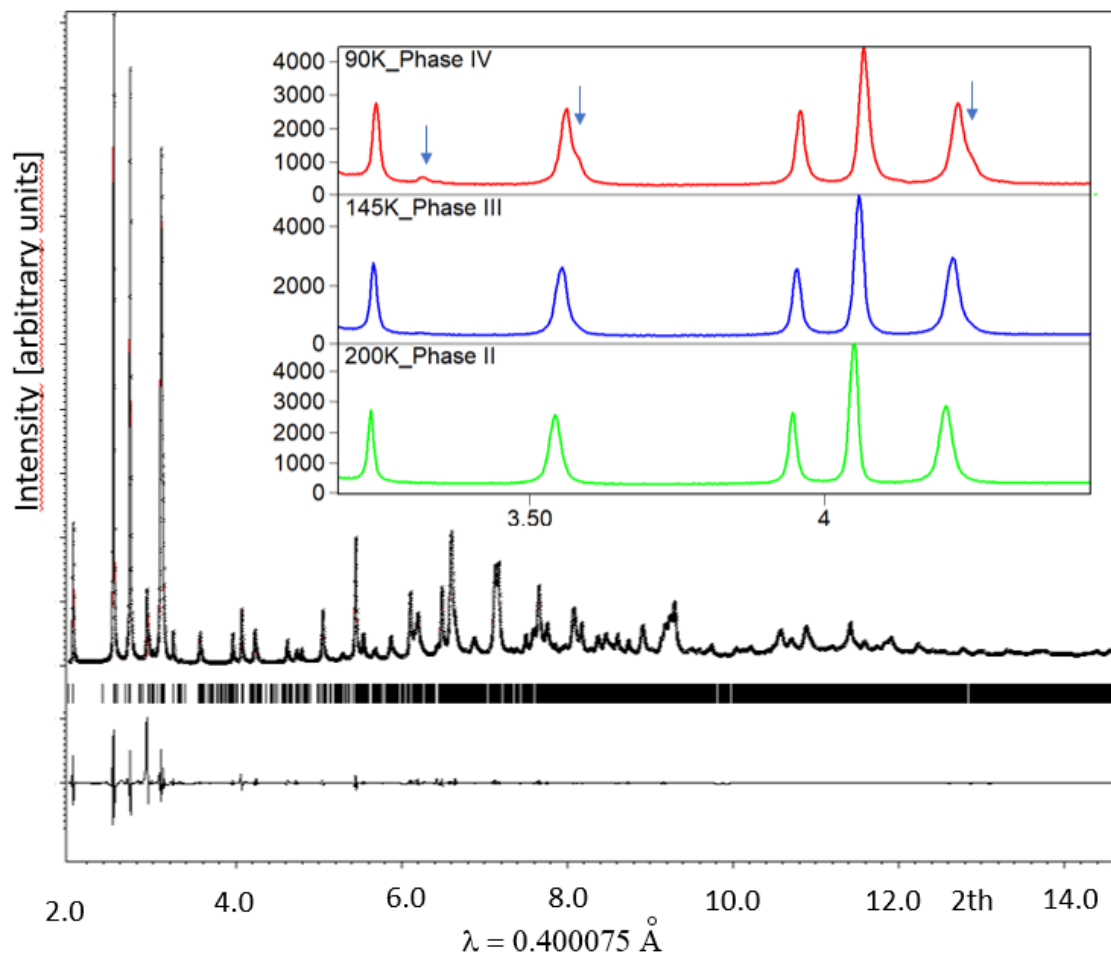

**Figure S1.** *Le Bail* profile refinement results for SXRD data collected for **1** – (pyrrolidinium)<sub>3</sub>[Bi<sub>2</sub>I<sub>9</sub>] at 90 K; **Phase IV**;  $a=8.6027(1)\text{\AA}$ ,  $b=18.1808(3)\text{\AA}$ ,  $c=45.14445(7)\text{\AA}$ ,  $\alpha=90.061(1)$ ,  $\beta=90.878(2)$ ,  $\gamma=90.378(2)$ ,  $R_p=0.031$ ,  $wR_p=0.059$ . The inset shows the comparison between selected peaks of Phase II, III and IV. The arrows mark new intensities that appear in Phase IV.

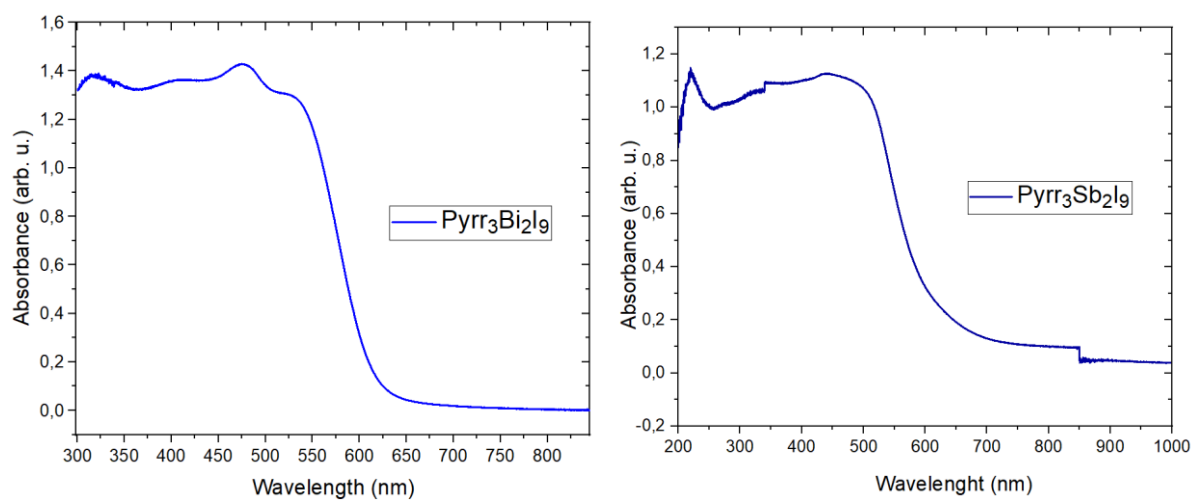

**Figure S2.** Diffuse reflectance spectra of **1** (left) and **2** (right)

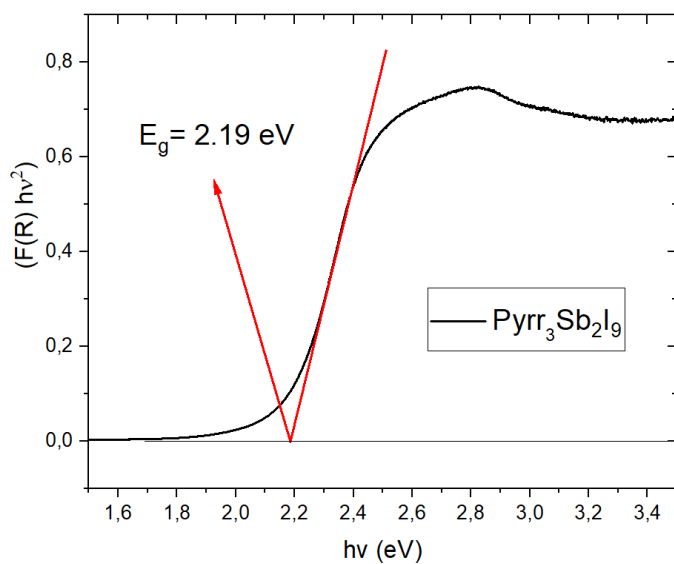

**Figure S3.** Band gap ( $E_g$ ) estimation for **2** with Tauc plot

### Proton Magnetic Resonance ( $^1\text{H}$ NMR)

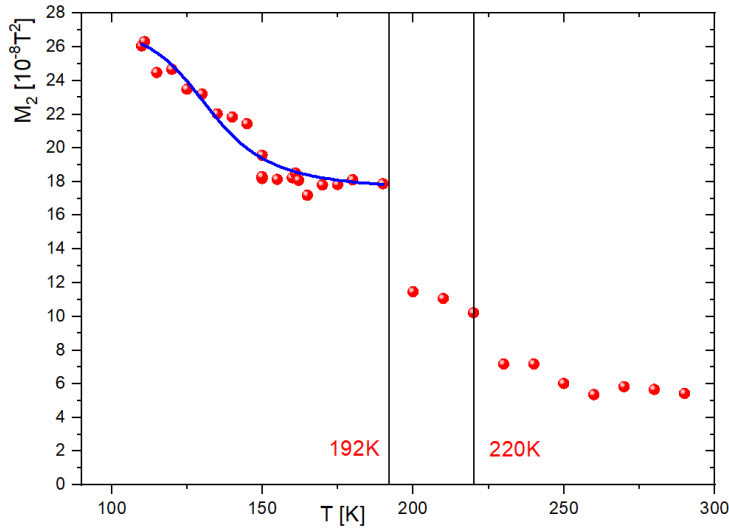

**Figure S4.**  $M_2$  Temperature dependence of second moment of  $^1\text{H}$  NMR line of **1**

Figure S4 depicts the temperature dependencies of the second moment  $M_2$  of the  $^1\text{H}$  NMR line of **1**. The  $M_2$  measurements reveal the detected phase transitions (PTs) observed through DSC and dielectric studies, as evidenced by a rapid reduction of the NMR line. The theoretical value of the second moment for a rigid lattice was calculated using the van Vleck formula [1]:

$$M_2 = \frac{3}{5} I(I+1) \gamma_H^2 \hbar^2 \frac{1}{N} \sum_{i=1}^N \sum_{j=1}^N R_{ij}^{-6},$$

where  $I$  represents the hydrogen nuclei spin,  $\gamma_H$  denotes the gyromagnetic ratio of proton spin ( $\gamma_H = 26.75221 \times 10^7 \text{ rad/Ts}$ ),  $R_{i,j}$  indicate the internuclear distance in the whole sample, and  $N$  refers to the number of resonant spins in the molecule. The computed value of the second moment for a rigid molecule ( $M_{2\text{rigid}}$ ) was determined to be  $22.14 \times 10^{-8} \text{ T}^2$ , which is lower than the measured value. For temperatures up to the PT at 192 K, the reduction of the second moment can be analyzed based on the BPP formula [2]:

$$M_2 = M_2 + (M_2 + M_2) \frac{2}{\pi} \arctg(\gamma_H \sqrt{M_2} \tau_c)$$

where the correlation time follows the Arrhenius law  $\tau_c = \tau_0 \exp(E_a/RT)$ ,  $M_{2\text{rigid}}$  and  $M_{2\text{motion}}$  represent the second moment values before (rigid) and after (motion) the onset of a given motion, respectively. Fitting the data yields the following parameters:  $E_a = 10.1 \text{ kJ/mol}$  and  $\tau_{c0}$

$= 8.04 \cdot 10^{-10}$  s (as shown by the fitting dotted curve in Fig. M2). Notably, in the vicinity of the PT at 192 K, a significant reduction of the second moment from  $18 \cdot 10^{-8} T^2$  to  $12 \cdot 10^{-8} T^2$  is observed, confirming a significant increase of the dynamics of the pyrrolidinium cations, the next drop is observed around 220 K. However, the value of  $M_2 \sim 5.5 \cdot 10^{-8} T^2$  in the HT phase indicates that pyrrolidinium cations do not follow free rotations.

[1] J.H. Van Vleck, Phys. Rev., 1948, 74, 1168

[2] N. Bloembergen, E.M. Purcell, R.V. Pond, Phys. Rev., 1948, 73, 679
